*Systolic blood pressure (continuous)*

| <b>Variable</b>            | <b>Estimate</b> | <b>z-value</b> | <b>Lower CI</b> | <b>Upper CI</b> |
|----------------------------|-----------------|----------------|-----------------|-----------------|
| BMI                        | 0.137           | 0.835          | -0.185          | 0.460           |
| Age (years)                | 0.256           | 1.565          | -0.065          | 0.576           |
| Male                       | 0.129           | 0.769          | -0.200          | 0.458           |
| Household size             | 0.278           | 1.738          | -0.036          | 0.592           |
| Alcohol in last week (y/n) | -0.063          | 0.383          | -0.382          | 0.257           |
| Tobacco in last week (y/n) | -0.090          | 0.577          | -0.394          | 0.215           |

*Diastolic blood pressure (continuous)*

| <b>Variable</b>            | <b>Estimate</b> | <b>z-value</b> | <b>Lower CI</b> | <b>Upper CI</b> |
|----------------------------|-----------------|----------------|-----------------|-----------------|
| BMI                        | 0.084           | 0.494          | -0.250          | 0.418           |
| Age (years)                | 0.008           | 0.046          | -0.323          | 0.339           |
| Male                       | -0.029          | 0.177          | -0.357          | 0.298           |
| Household size             | 0.148           | 0.880          | -0.182          | 0.477           |
| Alcohol in last week (y/n) | 0.124           | 0.746          | -0.201          | 0.449           |
| Tobacco in last week (y/n) | -0.206          | 1.294          | -0.517          | 0.106           |
